# Supplementary material
Source: PubMed Central journal article supplement (PMC5288817)
Supplement: AEM.02410-16_zam999117672s1.pdf [file AEM.02410-16_zam999117672s1.pdf]

## Supplemental Materials

### FlrA represses transcription of biofilm-associated *bpfA* operon in *Shewanella putrefaciens*

Yuan-Yuan Cheng<sup>1,3\*†</sup>, Chao Wu<sup>2†</sup>, Jia-Yi Wu<sup>1</sup>, Hui-Ling Jia<sup>1</sup>, Ming-Yu Wang<sup>3</sup>,  
Huan-Yu Wang<sup>1</sup>, Si-Min Zou<sup>1</sup>, Rui-Rui Sun<sup>1</sup>, Rong Jia<sup>1,3</sup>, Ya-Zhong Xiao<sup>1,3</sup>

<sup>1</sup>School of Life Sciences, Anhui University

<sup>2</sup>School of Resources and Environment, Anhui University

<sup>3</sup>Anhui Provincial Engineering Technology Research Center of Microorganisms and Biocatalysis, Anhui University

<sup>†</sup>These authors contributed equally to this work.

#### \* Corresponding author:

Yuan-Yuan Cheng, E-mail: [chengyy@mail.ustc.edu.cn](mailto:chengyy@mail.ustc.edu.cn)

**FIG S1**

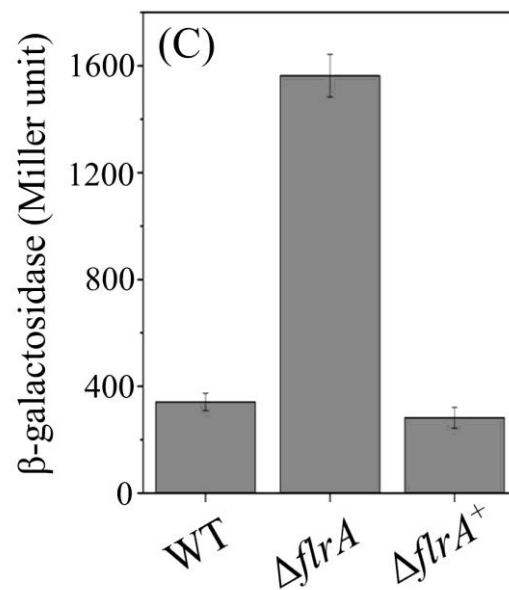

**FIG S1** Complementation of *flrA* by a single copy recovered the *bpfA* expression in  $\Delta flrA$  to the level of WT (3591Z). The gene of *flrA* was integrated into the neutral site of  $\Delta flrA$  (3591Z $\Delta flrA$ ) genome. The expression of *bpfA* was reported by *lacZ* transcriptionally fused into *bpfA* operon. The plus in superscript represented complementation strain. The error bars represented the standard deviation from three independent replicates.

**FIG S2**

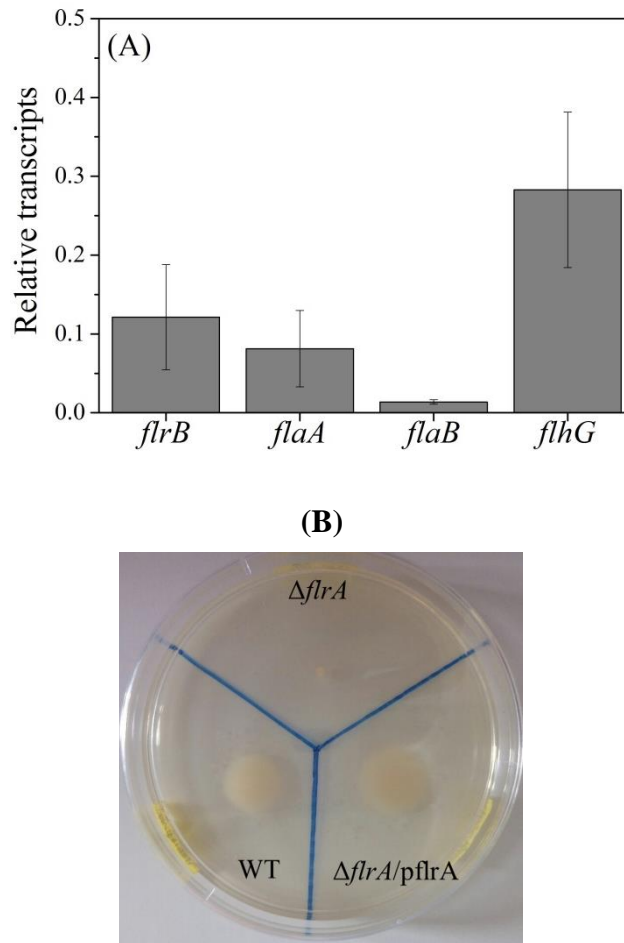

**FIG S2** FlrA is essential for the transcription of flagella coding genes and consequent motility. (A) The transcription levels of *flrB*, *flaA*, *flaB* and *flhG*, genes in the class II, III and IV of flagella synthesis, in  $\Delta flrA$  compared with that in WT. RNA was isolated from cultures grown to an OD of 1.0. Each value is the mean of three samples and the error bar indicates standard deviation. (B)  $\Delta flrA$  showed a dramatic deficiency in motility in a 0.3% agar plate compared with WT. The motility of  $\Delta flrA$  was recovered to comparable level of WT by introducing of plasmid-born *flrA* same as used in the assay of biofilm complementation.

**FIG S3**

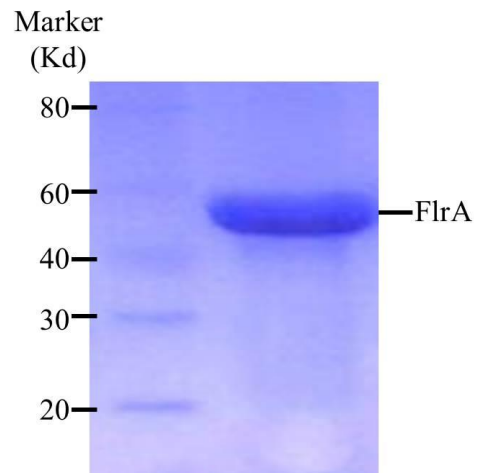

**FIG S3** Purified recombinant FlrA examined by SDS-PAGE.

**FIG S4**

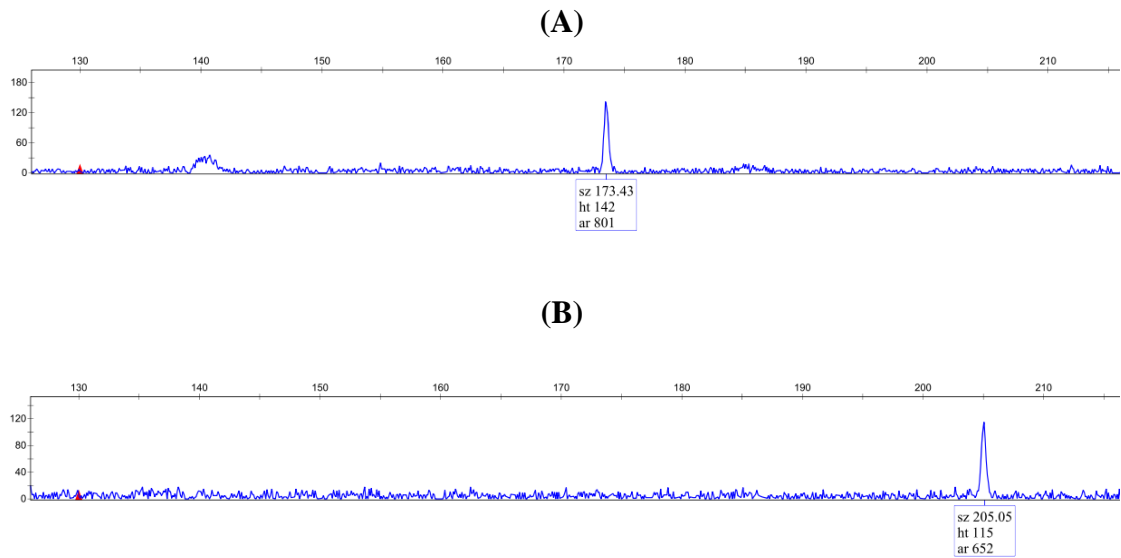

**FIG S4** Determination of the transcriptional start site of *bpfA* operon by fluorescent-based primer extension. Total RNA was isolated from WT grown to an  $OD_{600}$  of 1.0. cDNA was synthesized using 5'-FAM labelled primers of  $P_{bpfA}$ -R1-FAM (A) and  $P_{bpfA}$ -R2-FAM (B), respectively. The size of cDNA was determined by the capillary electrophoresis.

**FIG S5**

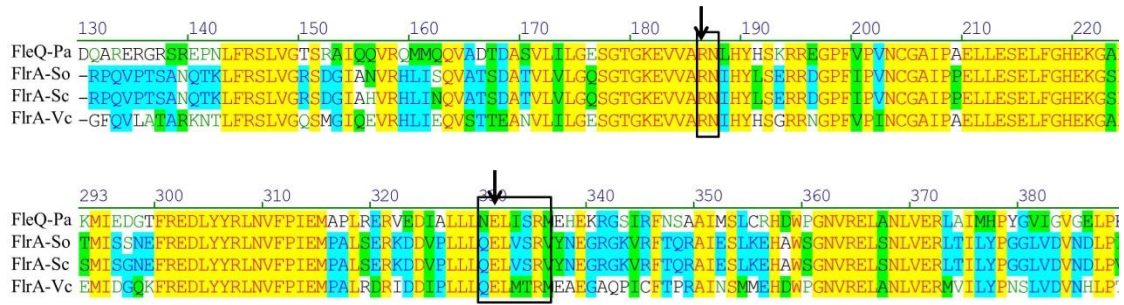

**FIG S5** Alignment of sequences of FlrA from *S. putrefaciens* CN32(Sc), *S. oneidensis* MR-1 (So), and *V. cholerae* (Vc) with FleQ from *P. aeruginosa* PAO1 (Pa). Black arrows point to the conserved residues in FleQ from *P. aeruginosa* PAO1 important for c-di-GMP binding.

FIG S6

(A)

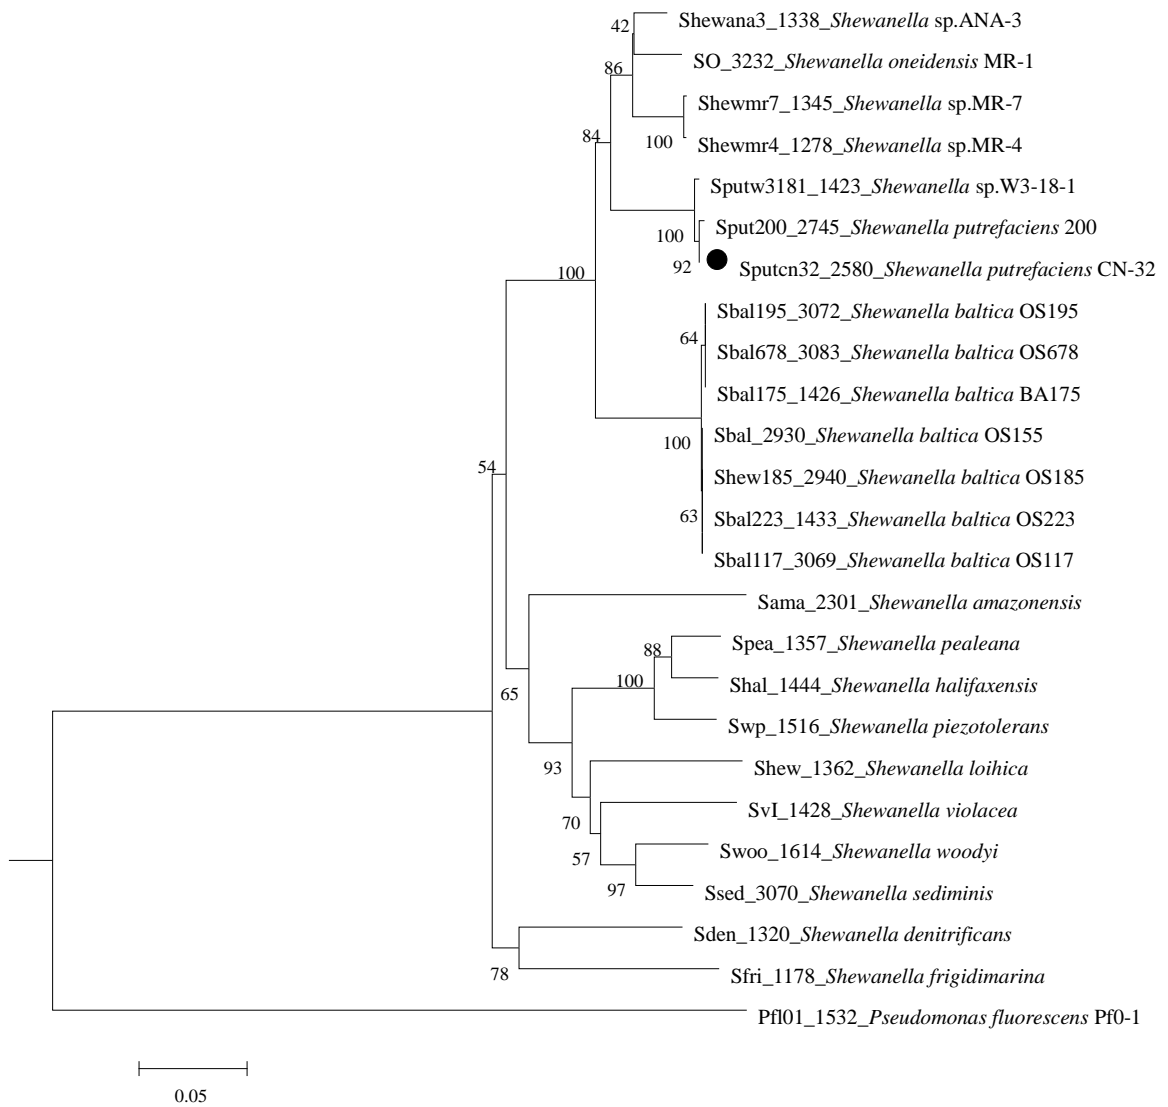

(B)

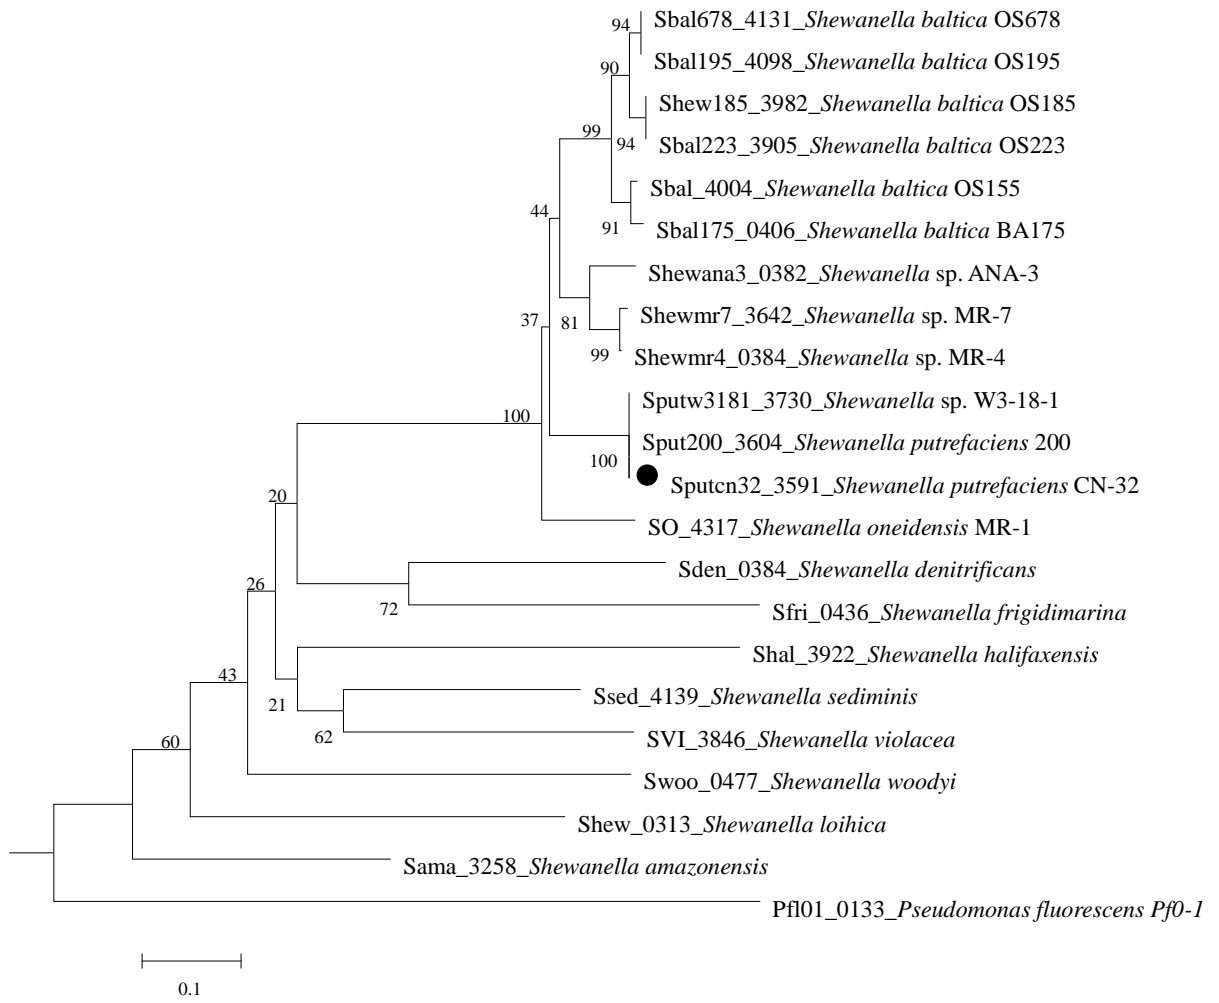



(C)

```
Sbal678_4131 -GTGTCAAAAAATTGACTTTCGACTCTTTGTTAGCTAAAATTCGAC-
Sbal195_4098 -GTGTCAAAAAATTGACTTTCGACTCTTTGTTAGCTAAAATTCGAC-
Shew185_3982 -GTGTCAAAAAATTGACTTGTGACACTTTGTTAGCTAAAATTCGAC-
Sbal223_3905 -GTGTCAAAAAATTGACTTGTGACACTTTGTTAGCTAAAATTCGAC-
Sbal_4004      -GTATCAAAAAAATTGACTTTCGACTCTTTATTAGCTAAAATTCGAC-
Shewana3_0382 -GCGTCAAAAAAATTGACTTCCCATTTAGTACCAAGCTAAAATTTTCAT-
Shewmr4_0384 -GCGTCAAAAAAATTGACTTCCCATTTAGTGCCAAGCTAAAATTTTCAT-
Sputw3181_3730 -GCGTCAAAAAAATTGACTTCCATTCGCTCATTAGCTAAAATTCAC-
Sput200_3604  -GCGTCAAAAAAATTGACTTCCATTCGCTCATTAGCTAAAATTCAC-
Sputw32_3591  -GCGTCAAAAAAATTGACTTCCATTCGCTCATTAGCTAAAATTCAC-
SO_4317       -GCGTCAAAAAAATTGACTTACACCGTTTGTGCAAGTAAAATTTTCAC-
Sden_0384     -ACGTCAAAAAAATTGACTACCCATTGCGAATGTTCTATAATTGTTG-
Sfri_0436     -ACGTCAAAAAAATTGACTACTTTTAGCAGCAAATGATATTATTAC-C-
Sal_3922      AACGTCAAAAAAATTGACTTAAAGCACCCATATGTATAACATTGATC-
Ssed_4139     AACTGCACAAGTTTGGACACACAGTGAAACTGGATCAGACTTTAGGTA
SVI_3846      -GCGTCAACAAAATTGACCACCCTTTTTTACATGGGTTAACATGCAGCC
Swoo_0477     -GCGTCAATAAAATTGACTTAAAGTAGGTGTTGTAGGTAAACATTTCG-C-
Shew_0313     -ACAACCAAAAAATTGGACAAGTAAATAGATGTGAAAGGAAAAGTTT---
Sama_3528     -CCGTCAAAAAAATTGACTTAA-GAGGTAITTTAGAAATTACACTTCAC-
Consensus     GCGTCAAAAAAATTGACTT C A      T TTAGCTAAAATTC AC
```

**FIG S6** Co-occurrence of FlrA and BpfA orthologs across the *Shewanellaceae*. Phylogenetic analysis of FlrA (A) and BpfA(B). Locus tag of genes from NCBI database are presented and followed by species names. The tree is drawn to scale with the scale bar representing substitutions per site. The analyses were conducted by MEGA6 (1). (C) The alignment of the promoter of these *bpfA*-coding genes. The DNA sequence of intergenic region between the translation start site of *bpfA*-coding gene and its upstream gene was selected. The alignment was conducted using Vector NTI (Invetrogen, USA). The DNA sequence of *bpfA* promoter in *S. putrefaciens* CN32 was selected as the profile during alignment. The neclotides labelled by yellow background indicate identical ones, and those labelled by blue indicate conservative ones.

## Reference

1. **Edgar R.** 2004. MUSCLE: multiple sequence alignment with high accuracy and high throughput. *Nucleic Acids Res* 32:1792–1797. <http://dx.doi.org/10.1093/nar/gkh340>.
